# Supplementary material for: Synthesis, structure and Hirshfeld surface analysis of a series of novel low melting salts without alkyl groups
Source: Royal Society of Chemistry journal article supplement (doi:10.1039/d1ce00933h), 2021-01-01
Supplement: d1ce00933h1.pdf [file d1ce00933h1.pdf]

## **Synthesis, structure and Hirshfeld surface analysis of a series of novel low melting salts without alkyl group**

Shan-Shan Yu,<sup>a</sup> Hai-Rong Zhao,<sup>b</sup> Jian-Han Shi,<sup>b</sup> Hui Zhang\*<sup>a</sup> and Hai-Bao Duan<sup>a</sup>

<sup>a</sup> Key laboratory of Advanced Functional Materials of Nanjing, Nanjing Xiaozhuang University, Nanjing 211171, P. R. China

<sup>b</sup> School of Environmental Science, Nanjing Xiaozhuang University, Nanjing 211171, P. R. China

Tel.: +86-25-86178437

E-mail: [duanhaibao4660@163.com](mailto:duanhaibao4660@163.com)

**Table S1** Crystal and structural refinement data of **1-4**

| Compound                            | <b>1</b>                                                    | <b>2</b>                                                       | <b>3</b>                                                        | <b>4</b>                                                        |
|-------------------------------------|-------------------------------------------------------------|----------------------------------------------------------------|-----------------------------------------------------------------|-----------------------------------------------------------------|
| Chemical formula                    | C <sub>5</sub> H <sub>7</sub> N <sub>2</sub> I <sub>3</sub> | C <sub>12</sub> H <sub>10</sub> N <sub>2</sub> FI <sub>3</sub> | C <sub>12</sub> H <sub>10</sub> N <sub>2</sub> ClI <sub>3</sub> | C <sub>12</sub> H <sub>10</sub> N <sub>2</sub> BrI <sub>3</sub> |
| CCDC no.                            | 2041337                                                     | 2041338                                                        | 2041339                                                         | 2041340                                                         |
| Formula weight                      | 475.83                                                      | 581.92                                                         | 598.37                                                          | 642.82                                                          |
| Temperature (K)                     | 100(2)                                                      | 100(2)                                                         | 100(2)                                                          | 100(2)                                                          |
| Wavelength (Å)                      | 0.71073                                                     | 0.71073                                                        | 0.71073                                                         | 0.71073                                                         |
| Crystal system                      | triclinic                                                   | monoclinic                                                     | monoclinic                                                      | monoclinic                                                      |
| Space group                         | <i>P</i> -1                                                 | <i>C</i> 2/ <i>c</i>                                           | <i>P</i> 2 <sub>1</sub> / <i>c</i>                              | <i>P</i> 2 <sub>1</sub> / <i>c</i>                              |
| a(Å)                                | 7.9381(6)                                                   | 16.7765(14)                                                    | 12.8734(5)                                                      | 12.8074(5)                                                      |
| b(Å)                                | 8.3518(9)                                                   | 12.5959(7)                                                     | 14.7359(6)                                                      | 14.9333(6)                                                      |
| c(Å)                                | 9.1264(9)                                                   | 17.5833(16)                                                    | 8.5326(3)                                                       | 8.4726(3)                                                       |
| α(°)                                | 79.736(9)                                                   | 90                                                             | 90                                                              | 90                                                              |
| β(°)                                | 88.578(7)                                                   | 121.008(12)                                                    | 91.977(3)                                                       | 91.583(3)                                                       |
| γ(°)                                | 64.587(9)                                                   | 90                                                             | 90                                                              | 90                                                              |
| V(Å <sup>3</sup> ) / Z              | 536.86(10)/2                                                | 3184.6(6)/8                                                    | 1617.68(11)/4                                                   | 1619.82(11)/4                                                   |
| Density (g·cm <sup>-3</sup> )       | 2.944                                                       | 2.428                                                          | 2.457                                                           | 2.636                                                           |
| Abs coeff. (mm <sup>-1</sup> )      | 8.677                                                       | 5.885                                                          | 5.947                                                           | 8.241                                                           |
| F(000)                              | 420.0                                                       | 2112.0                                                         | 1088.0                                                          | 1160.0                                                          |
| Data collect θ range                | 2.27-29.44                                                  | 2.11-24.99                                                     | 2.10-25.00                                                      | 2.77-28.97                                                      |
| Index range                         | -9 ≤ h ≤ 10<br>-10 ≤ k ≤ 9<br>-8 ≤ l ≤ 11                   | -17 ≤ h ≤ 19<br>-13 ≤ k ≤ 14<br>-17 ≤ l ≤ 20                   | -14 ≤ h ≤ 15<br>-17 ≤ k ≤ 13<br>-10 ≤ l ≤ 10                    | -15 ≤ h ≤ 12<br>-15 ≤ k ≤ 17<br>-10 ≤ l ≤ 8                     |
| Independent reflns                  | 2480                                                        | 2815                                                           | 2850                                                            | 2839                                                            |
| Refinement method on F <sup>2</sup> |                                                             | Full-matrix least-squares                                      |                                                                 |                                                                 |
| Data/restraints/parameters          | 2480/0/92                                                   | 2815/7/165                                                     | 2850/0/163                                                      | 2839/0/163                                                      |
| Goodness-of-fit on F <sup>2</sup>   | 1.050                                                       | 1.20                                                           | 1.039                                                           | 1.042                                                           |
| Final R indices [I > 2δ(I)]         | R1 = 0.0302<br>wR2 = 0.0369                                 | R1 = 0.0870<br>wR2 = 0.0930                                    | R1 = 0.0243<br>wR2 = 0.0304                                     | R1 = 0.0284<br>wR2 = 0.0337                                     |
| R indices (all data)                | R1 = 0.0618<br>wR2 = 0.0664                                 | R1 = 0.2368<br>wR2 = 0.2431                                    | R1 = 0.0414<br>wR2 = 0.0449                                     | R1 = 0.0575<br>wR2 = 0.0605                                     |

$$R_1 = \Sigma(|F_0| - |F_c|) / \Sigma|F_0|, wR_2 = \Sigma w(|F_0|^2 - |F_c|^2)^2 / \Sigma w(|F_0|^2)^{1/2}$$

**Table S2** Crystal and structural refinement data of **5-8**

| Compound                            | <b>5</b>                                                       | <b>6</b>                                                        | <b>7</b>                                                        | <b>8</b>                                                      |
|-------------------------------------|----------------------------------------------------------------|-----------------------------------------------------------------|-----------------------------------------------------------------|---------------------------------------------------------------|
| Chemical formula                    | C <sub>12</sub> H <sub>10</sub> N <sub>2</sub> FI <sub>3</sub> | C <sub>12</sub> H <sub>10</sub> N <sub>2</sub> ClI <sub>3</sub> | C <sub>12</sub> H <sub>10</sub> N <sub>2</sub> BrI <sub>3</sub> | C <sub>12</sub> H <sub>10</sub> N <sub>2</sub> I <sub>4</sub> |
| CCDC no.                            | 2041341                                                        | 2041342                                                         | 2041343                                                         | 2041428                                                       |
| Formula weight                      | 581.92                                                         | 598.37                                                          | 642.82                                                          | 689.82                                                        |
| Temperature (K)                     | 100(2)                                                         | 150(2)                                                          | 100(2)                                                          | 100(2)                                                        |
| Wavelength (Å)                      | 0.71073                                                        | 0.71073                                                         | 0.71073                                                         | 0.71073                                                       |
| Crystal system                      | orthorhombic                                                   | monoclinic                                                      | triclinic                                                       | triclinic                                                     |
| Space group                         | <i>P212121</i>                                                 | <i>P2<sub>1</sub>/c</i>                                         | <i>P-1</i>                                                      | <i>P-1</i>                                                    |
| a(Å)                                | 7.1679(3)                                                      | 7.4762(5)                                                       | 8.0318(12)                                                      | 9.2552(5)                                                     |
| b(Å)                                | 10.8199(4)                                                     | 8.8528(7)                                                       | 11.7511(7)                                                      | 9.4866(7)                                                     |
| c(Å)                                | 20.5129(9)                                                     | 25.417(2)                                                       | 18.3130(12)                                                     | 11.8244(10)                                                   |
| α(°)                                | 90                                                             | 90                                                              | 104.739(6)                                                      | 67.613(7)                                                     |
| β(°)                                | 90                                                             | 104.563(6)                                                      | 93.199(10)                                                      | 79.570(6)                                                     |
| γ(°)                                | 90                                                             | 90                                                              | 91.627(9)                                                       | 61.575(7)                                                     |
| V(Å <sup>3</sup> ) / Z              | 1590.90(11)/4                                                  | 1628.2(2)/4                                                     | 1667.3(3)/4                                                     | 844.21(12)/2                                                  |
| Density (g·cm <sup>-3</sup> )       | 2.430                                                          | 2.441                                                           | 2.561                                                           | 2.714                                                         |
| Abs coeff. (mm <sup>-1</sup> )      | 5.890                                                          | 5.909                                                           | 8.007                                                           | 7.369                                                         |
| F(000)                              | 1056.0                                                         | 1088.0                                                          | 1160.0                                                          | 616.0                                                         |
| Data collect θ range                | 2.71-29.04                                                     | 2.35-29.28                                                      | 2.30-279.12                                                     | 2.50-29.27                                                    |
| Index range                         | -8 ≤ h ≤ 8<br>-12 ≤ k ≤ 12<br>-24 ≤ l ≤ 22                     | -10 ≤ h ≤ 9<br>-11 ≤ k ≤ 11<br>-33 ≤ l ≤ 26                     | -11 ≤ h ≤ 9<br>-16 ≤ k ≤ 16<br>-25 ≤ l ≤ 22                     | -10 ≤ h ≤ 10<br>-11 ≤ k ≤ 11<br>-14 ≤ l ≤ 14                  |
| Independent reflns                  | 2819                                                           | 3776                                                            | 4156                                                            | 2966                                                          |
| Refinement method on F <sup>2</sup> |                                                                | Full-matrix least-squares                                       |                                                                 |                                                               |
| Data/restraints/parameters          | 2819/0/163                                                     | 3776/0/163                                                      | 7775/0/325                                                      | 2966/0/167                                                    |
| Goodness-of-fit on F <sup>2</sup>   | 1.051                                                          | 1.062                                                           | 1.094                                                           | 1.007                                                         |
| Final R indices [I > 2δ(I)]         | R1 = 0.0209<br>wR2 = 0.0219                                    | R1 = 0.0783<br>wR2 = 0.1240                                     | R1 = 0.0788<br>wR2 = 0.0841                                     | R1 = 0.0233<br>wR2 = 0.0270                                   |
| R indices (all data)                | R1 = 0.0419<br>wR2 = 0.0424                                    | R1 = 0.1812<br>wR2 = 0.2244                                     | R1 = 0.1844<br>wR2 = 0.1920                                     | R1 = 0.0403<br>wR2 = 0.0422                                   |

$$R_1 = \Sigma(|F_0| - |F_c|) / \Sigma|F_0|, wR_2 = \Sigma w(|F_0|^2 - |F_c|^2)^2 / \Sigma w(|F_0|^2)^{1/2}$$

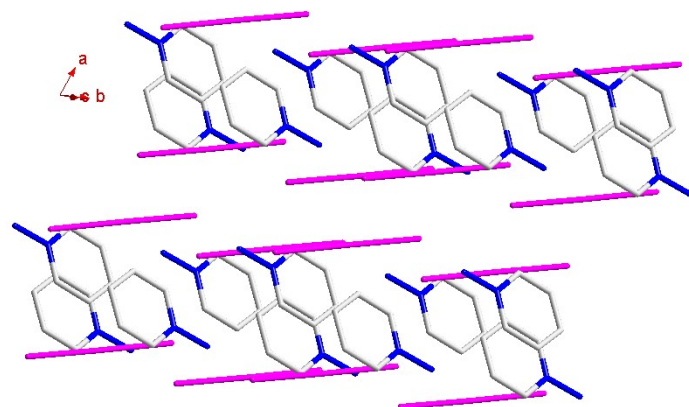

Figure S1 The crystal packing structure of **1** along the c-axis.

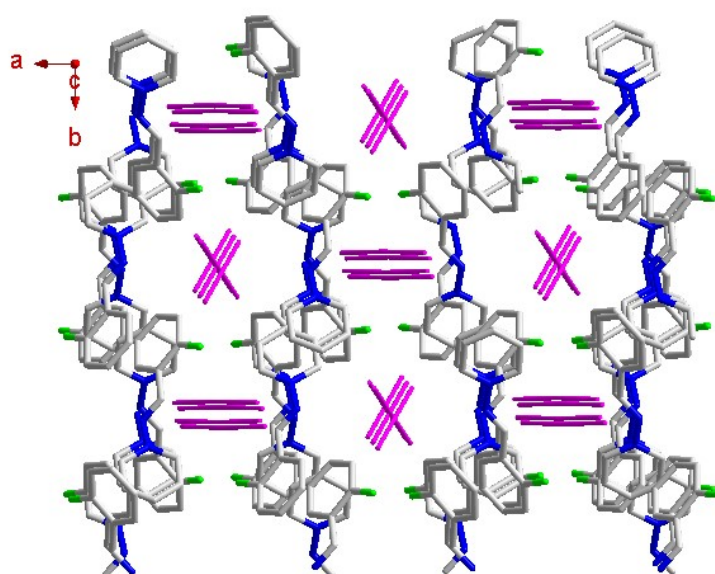

Figure S2 The parallelogram-like channels were formed by cations along the c-axis direction, and the crystallographically different  $I_3^-$  anion stacks are filled inside the supramolecular channels for **2**.

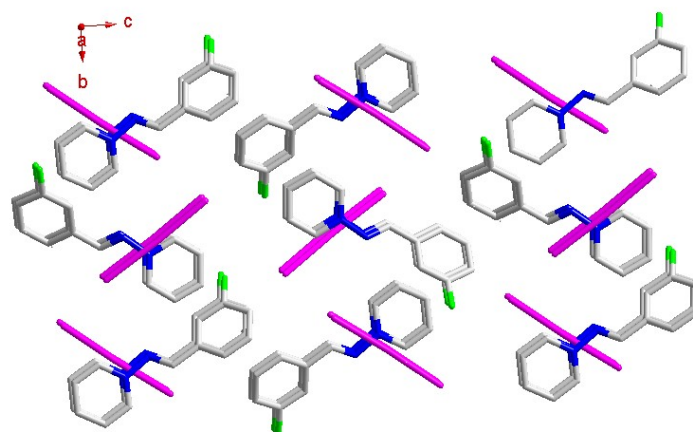

Figure S3. Along the a-axis direction, the anions and cations form mixed stack in **5**.

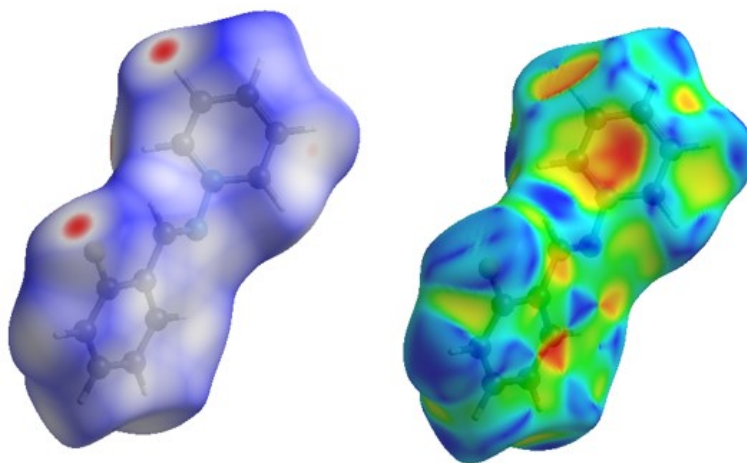

Figure S4. Hirshfeld surfaces mapped with (a)  $d_{\text{normal}}$  and (b) shape index of **2**

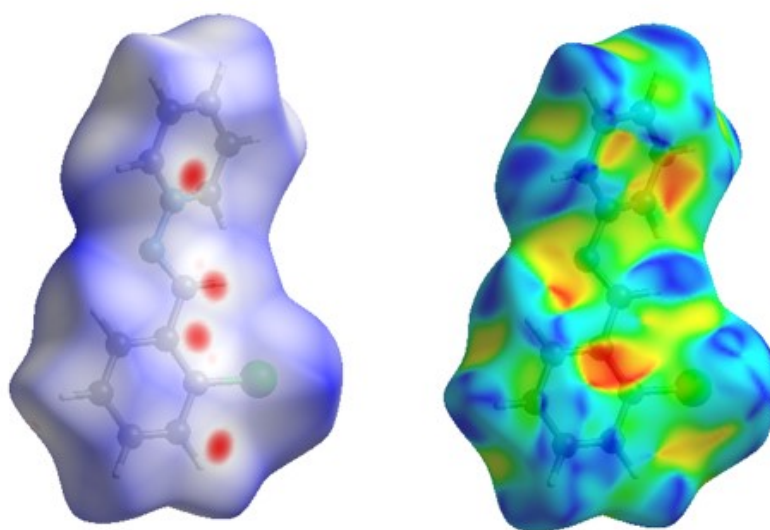

Figure S5. Hirshfeld surfaces mapped with (a)  $d_{\text{normal}}$  and (b) shape index of **3**

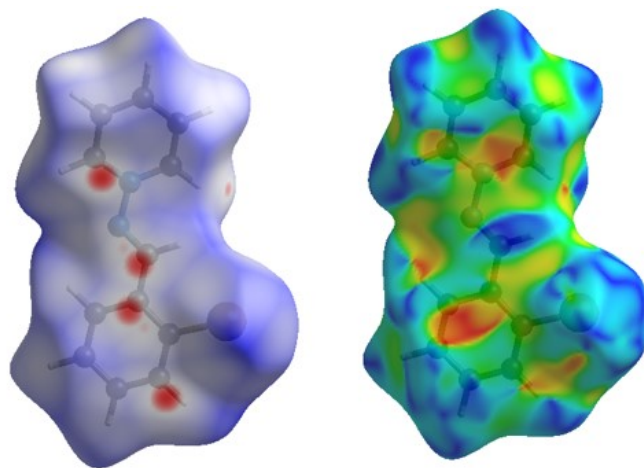

Figure S6. Hirshfeld surfaces mapped with (a)  $d_{\text{normal}}$  and (b) shape index of 4

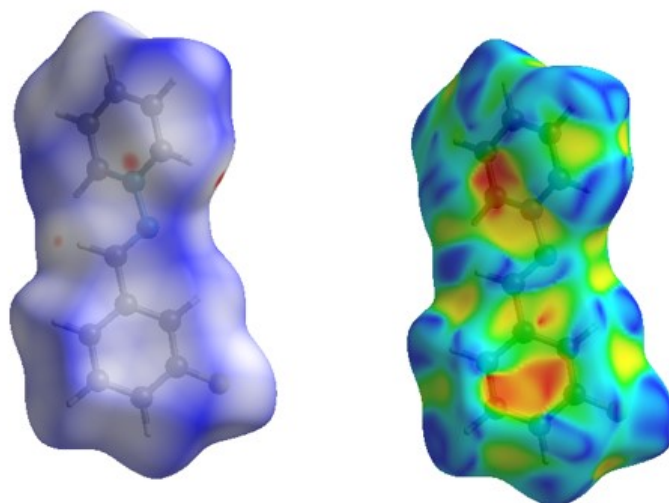

Figure S7. Hirshfeld surfaces mapped with (a)  $d_{\text{normal}}$  and (b) shape index of 5

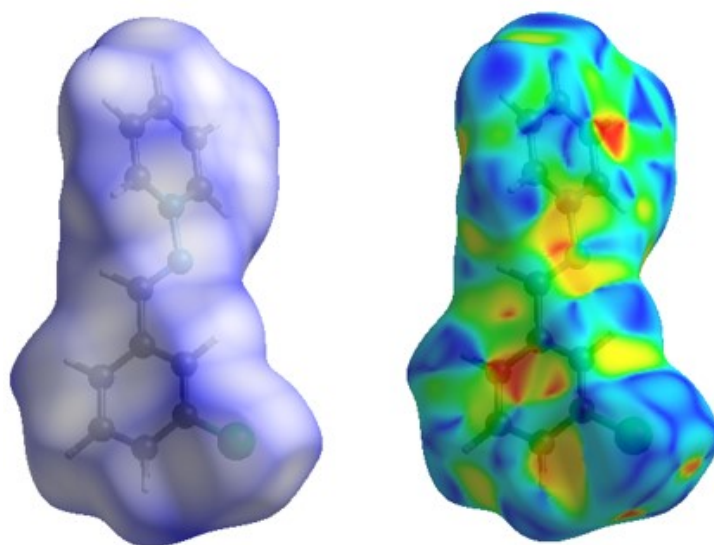

Figure S8. Hirshfeld surfaces mapped with (a)  $d_{\text{normal}}$  and (b) shape index of 6

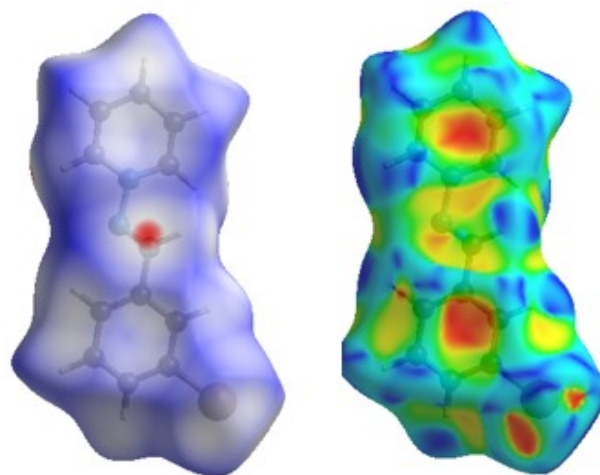

Figure S9. Hirshfeld surfaces mapped with (a)  $d_{\text{normal}}$  and (b) shape index of **7**

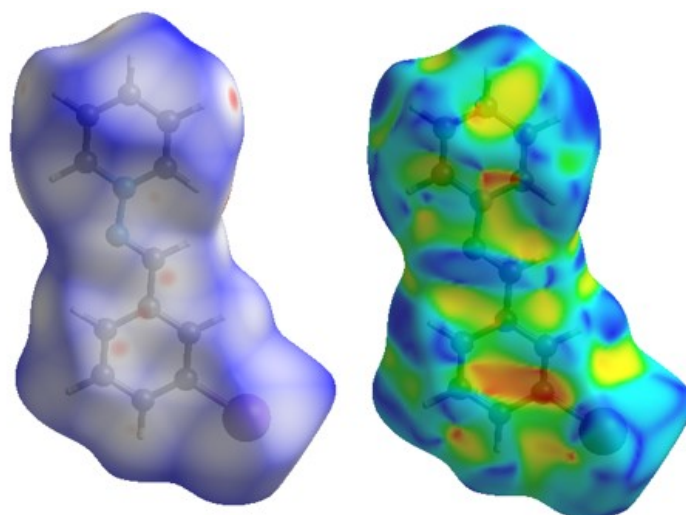

Figure S10. Hirshfeld surfaces mapped with (a)  $d_{\text{normal}}$  and (b) shape index of **8**
